# Supplementary material for: Proton pump inhibitors and the risk of hospitalisation for community-acquired pneumonia: replicated cohort studies with meta-analysis
Source: HighWire-hosted journal article supplement (doi:10.1136/gutjnl-2013-304738), 2013-07-15

## **ONLINE APPENDICES**

**Online Appendix 1.** Demographic and clinical characteristics by exposure status at cohort entry in a restricted cohort of new users of non-steroidal anti-inflammatory drugs.

|                          | H2RA Analysis |            |
|--------------------------|---------------|------------|
|                          | H2RA Exposed  | Unexposed* |
| Total Number of Patients | 47,344        | 4,342,733  |
| Database (%)             |               |            |
| Alberta                  | 3.1           | 4.1        |
| Saskatchewan             | 5.8           | 4.6        |
| Manitoba                 | 5.0           | 5.3        |
| Ontario                  | 61.1          | 21.7       |
| Quebec                   | 0.1           | 0.7        |
| Nova Scotia              | 2.1           | 0.9        |
| MarketScan               | 13.8          | 49.6       |
| GPRD                     | 9.0           | 13.0       |
| Age (%) [Years] †        |               |            |
| 40-54                    | 16.2          | 41.8       |
| 55-64                    | 10.3          | 23.8       |
| 65-74                    | 41.6          | 19.4       |
| 75-84                    | 26.5          | 12.2       |
| 85+                      | 5.4           | 2.8        |
| Women (%)                | 63.7          | 58.0       |
| Year of Cohort Entry (%) |               |            |
| 1997                     | 4.9           | 1.5        |
| 1998                     | 7.0           | 2.5        |
| 1999                     | 7.5           | 3.1        |
| 2000                     | 8.2           | 4.5        |
| 2001                     | 7.9           | 4.7        |
| 2002                     | 8.0           | 4.7        |
| 2003                     | 7.6           | 4.9        |
| 2004                     | 6.9           | 4.7        |
| 2005                     | 6.1           | 3.8        |
| 2006                     | 5.9           | 3.9        |
| 2007                     | 9.5           | 18.0       |
| 2008                     | 9.0           | 18.5       |
| 2009                     | 8.2           | 17.6       |
| 2010                     | 3.2           | 7.6        |
| 2011                     | 0.1           | 0.1        |
| Nursing Home (%) ‡       | 0.6           | 0.8        |
| Urban (%) §              | 86.9          | 78.8       |
| Comorbidities (%)        |               |            |

|                                                         |      |      |
|---------------------------------------------------------|------|------|
| Asthma                                                  | 3.8  | 1.9  |
| Bronchiectasis                                          | 0.1  | 0.1  |
| COPD                                                    | 3.9  | 2.5  |
| Diabetes                                                | 10.8 | 9.6  |
| Non-hospitalized pneumonia                              | 2.5  | 2.2  |
| Hospitalizations in the Year Preceding Cohort Entry (%) |      |      |
| None                                                    | 92.3 | 93.2 |
| One                                                     | 6.1  | 5.6  |
| Two                                                     | 1.1  | 0.9  |
| Three                                                   | 0.3  | 0.2  |
| Four or More                                            | 0.1  | 0.1  |
| Prescriptions in the Year Preceding Cohort Entry (%)    |      |      |
| None                                                    | 2.8  | 5.6  |
| One                                                     | 4.9  | 8.6  |
| Two                                                     | 6.7  | 9.9  |
| Three                                                   | 7.7  | 10.3 |
| Four or More                                            | 77.9 | 65.6 |
| Medications (%) <sup>  </sup>                           |      |      |
| PPI <sup>†</sup>                                        | 3.7  | 2.9  |
| H2RA <sup>†</sup>                                       | 34.0 | 1.6  |
| NSAIDs <sup>†</sup>                                     | 40.3 | 28.4 |
| Immunosuppressive Agents                                | 0.5  | 1.1  |
| Influenza Vaccine <sup>**</sup>                         | 11.0 | 5.6  |
| Inhaled Bronchodilators                                 | 11.1 | 8.3  |
| Inhaled Corticosteroids                                 | 10.2 | 13.1 |
| Pneumococcal Vaccine <sup>**</sup>                      | 4.5  | 2.4  |
| Non-Topical Antibiotics                                 | 43.7 | 44.5 |
| Non-Topical Corticosteroids                             | 10.4 | 16.3 |

Abbreviations: COPD = Chronic Obstructive Pulmonary Disease; H2RA = Histamine-2 Receptor Antagonist; NSAIDs = Non-Steroidal Anti-Inflammatory Drugs; PPI = Proton Pump Inhibitor.

\*Saskatchewan did not contribute to the PPI analysis. In addition, small differences in the unexposed groups exist in the PPI and H2RA analyses because of trimming during the estimation of high-dimensional propensity scores.

<sup>†</sup>Alberta, Ontario, Quebec, and Nova Scotia only contributed data for those > 66 years of age whereas MarketScan only contributed data for those aged 40-65 years.

<sup>‡</sup>The proportion of study participants living in nursing homes was only reported by Manitoba and Ontario.

<sup>§</sup>Data regarding urban/rural location were only available in Alberta, Manitoba, Nova Scotia, and Ontario.

<sup>||</sup>Comorbidities and medication use are defined using data in the year prior to and including the date of cohort entry.

<sup>††</sup>Denotes use in the 7-12 months before cohort entry. Use in the 6 months before cohort entry resulted in exclusion.

<sup>\*\*</sup>Vaccination data were only available for the GPRD, Manitoba, MarketScan, and Nova Scotia.

**Online Appendix 2.** Demographic and clinical characteristics by exposure status at cohort entry in a restricted cohort of new users of non-steroidal anti-inflammatory drugs, with analyses restricted to one, randomly-selected observation per patient.

|                          | PPI Analysis |            | H2RA Analysis |            |
|--------------------------|--------------|------------|---------------|------------|
|                          | PPI Exposed  | Unexposed* | H2RA Exposed  | Unexposed* |
| Total Number of Patients | 68,268       | 2,914,279  | 30,193        | 3,050,116  |
| Database (%)             |              |            |               |            |
| Alberta                  | 5.8          | 3.7        | 3.2           | 3.6        |
| Saskatchewan             | 0            | 0          | 6.0           | 4.2        |
| Manitoba                 | 2.8          | 4.8        | 5.2           | 4.6        |
| Ontario                  | 30.9         | 18.6       | 56.3          | 17.9       |
| Quebec                   | 1.0          | 0.6        | 0.1           | 0.6        |
| Nova Scotia              | 0.4          | 0.9        | 2.3           | 0.9        |
| MarketScan               | 31.5         | 59.7       | 17.8          | 57.1       |
| GPRD                     | 27.8         | 11.6       | 9.1           | 11.2       |
| Age (%) [Years] †        |              |            |               |            |
| 40-54                    | 27.5         | 45.7       | 19.1          | 45.9       |
| 55-64                    | 21.6         | 25.5       | 11.7          | 25.3       |
| 65-74                    | 29.3         | 16.4       | 39.9          | 16.5       |
| 75-84                    | 17.0         | 9.9        | 23.9          | 9.9        |
| 85+                      | 4.6          | 2.5        | 5.4           | 2.5        |
| Women (%)                | 61.9         | 57.5       | 63.1          | 57.4       |
| Year of Cohort Entry (%) |              |            |               |            |
| 1997                     | 0.2          | 1.3        | 5.6           | 1.6        |
| 1998                     | 0.5          | 2.1        | 7.1           | 2.3        |
| 1999                     | 0.6          | 2.5        | 7.2           | 2.7        |
| 2000                     | 1.5          | 3.8        | 8.1           | 4.0        |
| 2001                     | 2.2          | 3.9        | 7.8           | 4.1        |
| 2002                     | 2.9          | 3.8        | 7.5           | 4.0        |
| 2003                     | 4.1          | 3.9        | 7.0           | 4.0        |
| 2004                     | 5.2          | 3.7        | 6.4           | 3.9        |
| 2005                     | 6.3          | 2.9        | 5.5           | 3.0        |
| 2006                     | 7.9          | 2.9        | 5.4           | 3.1        |
| 2007                     | 17.9         | 20.2       | 10.0          | 19.6       |
| 2008                     | 22.0         | 20.6       | 9.6           | 20.0       |
| 2009                     | 21.8         | 19.9       | 9.1           | 19.3       |
| 2010                     | 6.9          | 8.5        | 3.6           | 8.4        |
| 2011                     | 0.0          | 0.0        | 0.1           | 0.1        |
| Nursing Home (%) ‡       | 0.8          | 1.1        | 0.9           | 1.1        |
| Urban (%) §              | 85.2         | 78.2       | 86.1          | 78.2       |
| Comorbidities (%)        |              |            |               |            |
| Asthma                   | 2.5          | 1.6        | 3.5           | 1.6        |
| Bronchiectasis           | 0.1          | 0.0        | 0.1           | 0.0        |
| COPD                     | 3.0          | 2.1        | 3.9           | 2.2        |
| Diabetes                 | 10.0         | 9.7        | 11.0          | 9.6        |

|                                                         |      |      |      |      |
|---------------------------------------------------------|------|------|------|------|
| Non-hospitalized pneumonia                              | 2.3  | 2.2  | 2.6  | 2.2  |
| Hospitalizations in the Year Preceding Cohort Entry (%) |      |      |      |      |
| None                                                    | 91.6 | 93.3 | 91.7 | 93.2 |
| One                                                     | 6.9  | 5.6  | 6.6  | 5.6  |
| Two                                                     | 1.1  | 0.9  | 1.2  | 0.9  |
| Three                                                   | 0.3  | 0.2  | 0.4  | 0.2  |
| Four or More                                            | 0.1  | 0.1  | 0.2  | 0.1  |
| Prescriptions in the Year Preceding Cohort Entry (%)    |      |      |      |      |
| None                                                    | 4.5  | 5.7  | 3.3  | 6.2  |
| One                                                     | 6.8  | 8.9  | 5.6  | 9.2  |
| Two                                                     | 7.9  | 10.1 | 7.0  | 10.3 |
| Three                                                   | 8.7  | 10.3 | 8.1  | 10.4 |
| Four or More                                            | 72.2 | 65.1 | 76.0 | 63.9 |
| Medications (%) <sup>  </sup>                           |      |      |      |      |
| PPI <sup>†</sup>                                        | 22.8 | 3.2  | 3.9  | 3.1  |
| H2RA <sup>†</sup>                                       | 2.6  | 1.5  | 30.5 | 1.5  |
| NSAIDs <sup>†</sup>                                     | 24.8 | 21.0 | 33.2 | 20.8 |
| Immunosuppressive Agents                                | 1.4  | 1.2  | 0.6  | 1.2  |
| Influenza Vaccine <sup>**</sup>                         | 18.6 | 4.5  | 8.5  | 4.3  |
| Inhaled Bronchodilators                                 | 11.2 | 8.1  | 11.0 | 8.0  |
| Inhaled Corticosteroids                                 | 12.0 | 14.3 | 10.8 | 13.9 |
| Pneumococcal Vaccine <sup>**</sup>                      | 10.7 | 1.9  | 3.9  | 1.9  |
| Non-Topical Antibiotics                                 | 42.9 | 45.2 | 43.6 | 44.7 |
| Non-Topical Corticosteroids                             | 14.1 | 18.0 | 11.1 | 17.4 |

Abbreviations: COPD = Chronic Obstructive Pulmonary Disease; H2RA = Histamine-2 Receptor Antagonist; NSAIDs = Non-Steroidal Anti-Inflammatory Drugs; PPI = Proton Pump Inhibitor.

\*Saskatchewan did not contribute to the PPI analysis. In addition, small differences in the unexposed groups exist in the PPI and H2RA analyses because of trimming during the estimation of high-dimensional propensity scores.

<sup>†</sup>Alberta, Ontario, Quebec, and Nova Scotia only contributed data for those  $\geq 66$  years of age whereas MarketScan only contributed data for those aged 40-65 years.

<sup>‡</sup>The proportion of study participants living in nursing homes was only reported by Manitoba and Ontario.

<sup>§</sup>Data regarding urban/rural location were only available in Alberta, Manitoba, Nova Scotia, and Ontario.

<sup>||</sup>Comorbidities and medication use are defined using data in the year prior to and including the date of cohort entry.

<sup>¶</sup>Denotes use in the 7-12 months before cohort entry. Use in the 6 months before cohort entry resulted in exclusion.

<sup>\*\*</sup>Vaccination data were only available for the GPRD, Manitoba, MarketScan, and Nova Scotia.

**Online Appendix 3.** Sensitivity analysis examining the association between the use of proton pump inhibitors and the 6-month cumulative incidence of hospitalization for community-acquired pneumonia in a restricted cohort of new users of non-steroidal anti-inflammatory drugs, with analysis restricted to one random-observation per patients. Analyses were adjusted for age, sex, previous non-hospitalized pneumonia, prescription of proton pump inhibitors, histamine-2 receptor antagonists, and non-steroidal anti-inflammatory drugs in the 7 to 12 months prior to cohort entry, and high-dimensional propensity score decile. Abbreviations: CI = Confidence Interval; GPRD = General Practice Research Database; OR = Odds Ratio.

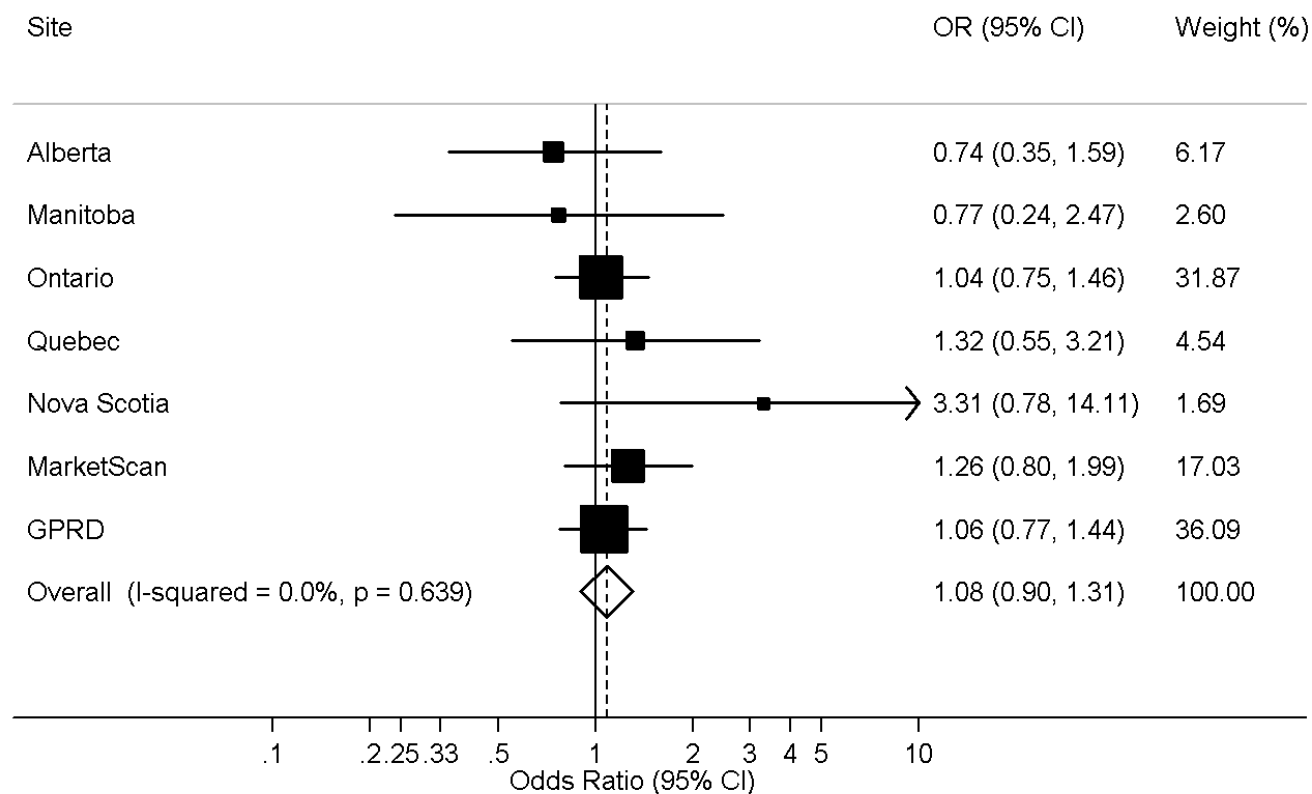

**Online Appendix 4.** Sensitivity analysis examining the association between the use of proton pump inhibitors and the 6-month cumulative incidence of hospitalization for community-acquired pneumonia in a restricted cohort of new users of non-steroidal anti-inflammatory drugs and excluding users of proton pump inhibitors, histamine-2 receptor antagonists, and non-steroidal anti-inflammatory drugs in the year prior to cohort entry. Analyses were adjusted for age, sex, previous non-hospitalized pneumonia, and high-dimensional propensity score decile. Abbreviations: CI = Confidence Interval; GPRD = General Practice Research Database; OR = Odds Ratio.

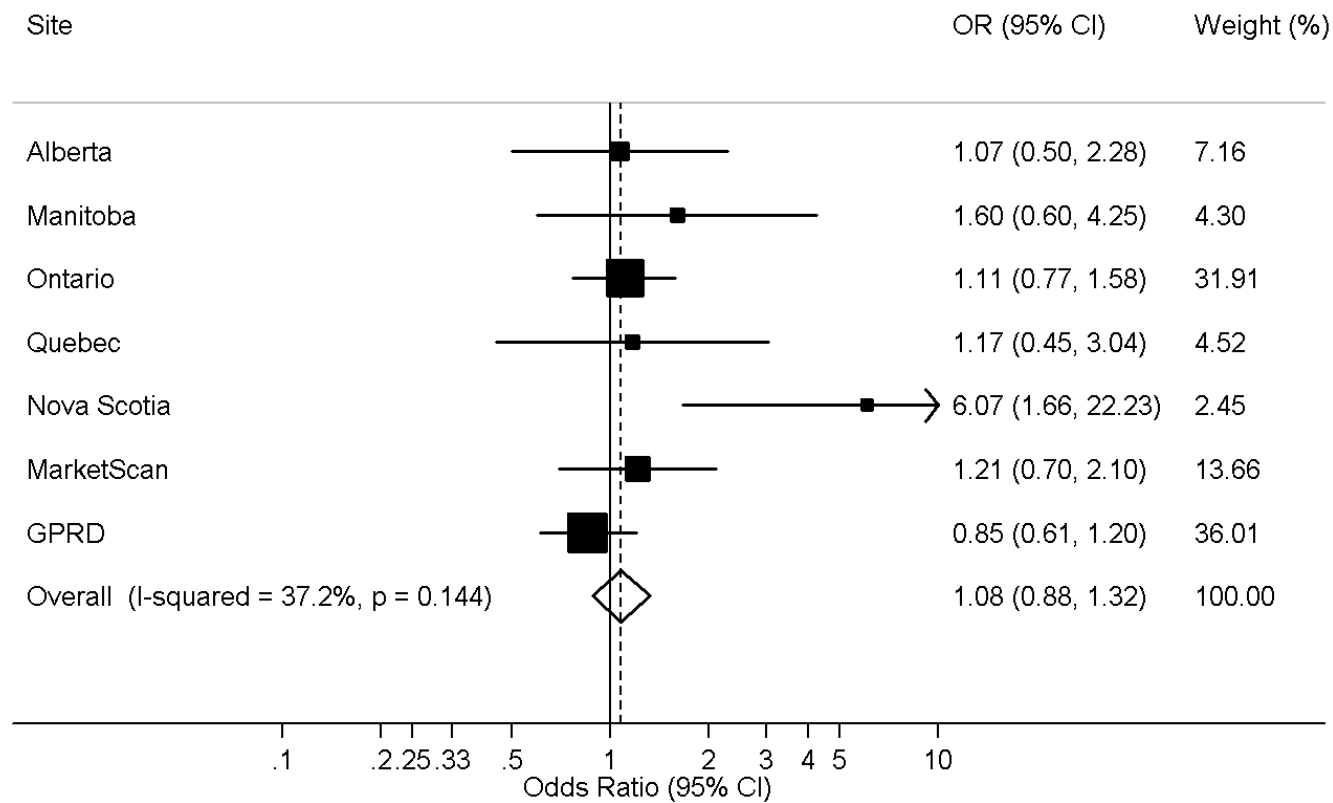

**Online Appendix 5.** Sensitivity analysis examining the association between the use of proton pump inhibitors and the 6-month cumulative incidence of hospitalization for community-acquired pneumonia in a restricted cohort of new users of non-steroidal anti-inflammatory drugs and excluding cross-overs. Analyses were adjusted for age, sex, previous non-hospitalized pneumonia, prescription of proton pump inhibitors, histamine-2 receptor antagonists, and non-steroidal anti-inflammatory drugs in the 7 to 12 months prior to cohort entry, and high-dimensional propensity score decile. Abbreviations: CI = Confidence Interval; GPRD = General Practice Research Database; OR = Odds Ratio.

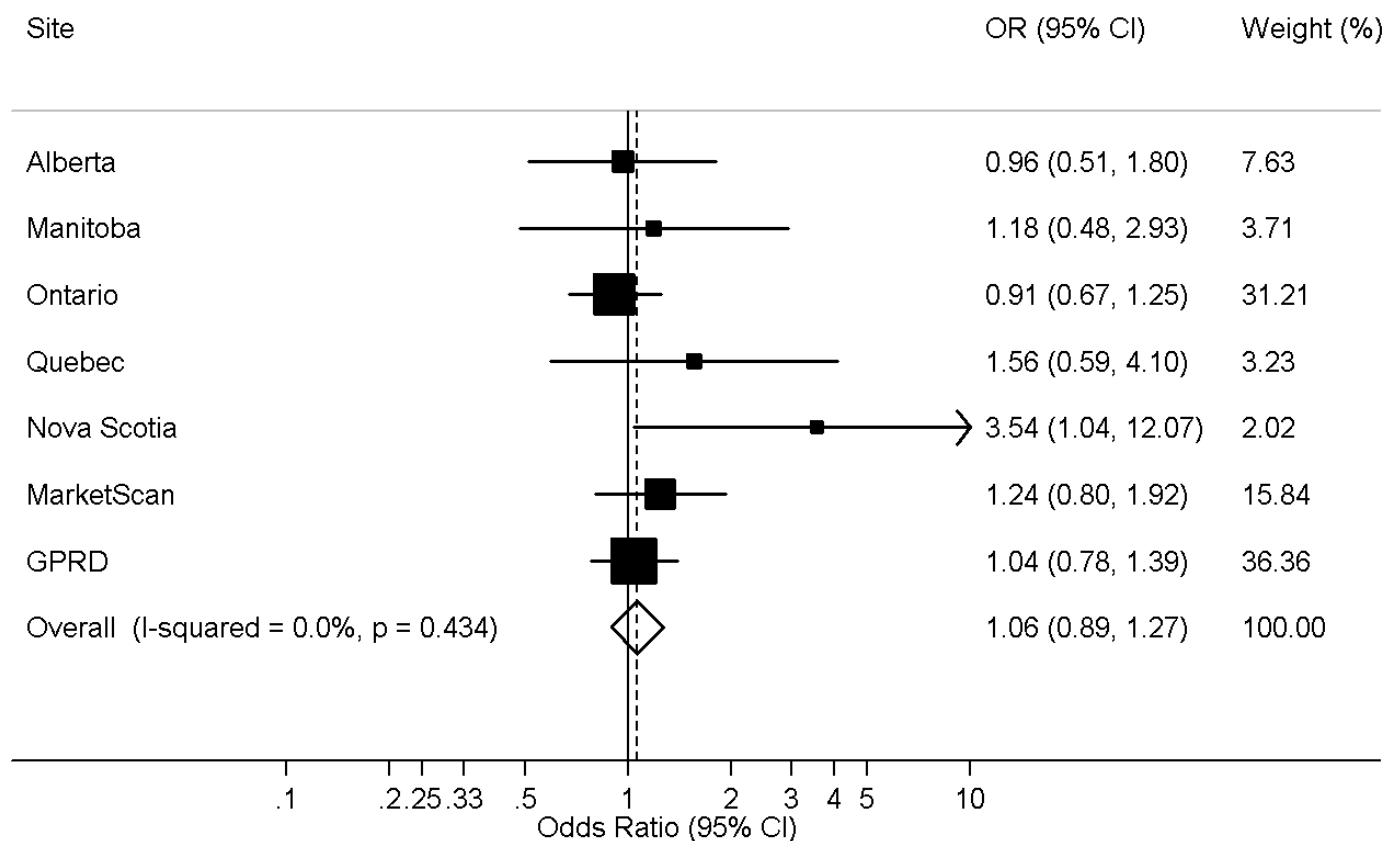



**Online Appendix 6.** Sensitivity analysis examining the association between the use of histamine-2 receptor antagonists and the 6-month cumulative incidence of hospitalization for community-acquired pneumonia in a restricted cohort of new users of non-steroidal anti-inflammatory drugs, with analysis restricted to one random-observation per patients. Analyses were adjusted for age, sex, previous non-hospitalized pneumonia, prescription of proton pump inhibitors, histamine-2 receptor antagonists, and non-steroidal anti-inflammatory drugs in the 7 to 12 months prior to cohort entry, and high-dimensional propensity score decile. Abbreviations: CI = Confidence Interval; GPRD = General Practice Research Database; OR = Odds Ratio.

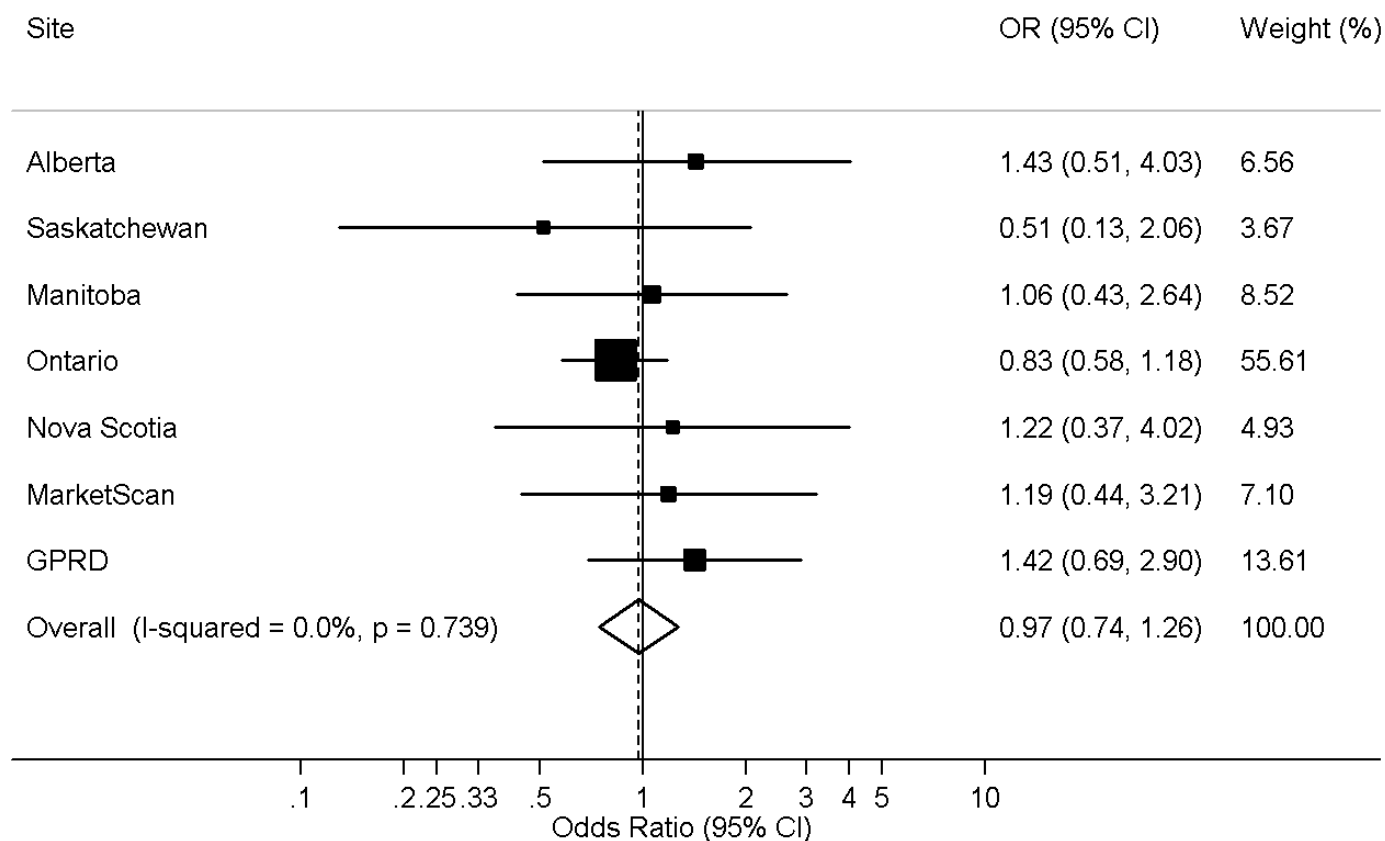

**Online Appendix 7.** Sensitivity analysis examining the association between the use of histamine-2 receptor antagonists and the 6-month cumulative incidence of hospitalization for community-acquired pneumonia in a restricted cohort of new users of non-steroidal anti-inflammatory drugs and excluding users of proton pump inhibitors, histamine-2 receptor antagonists, and non-steroidal anti-inflammatory drugs in the year prior to cohort entry. Analyses were adjusted for age, sex, previous non-hospitalized pneumonia, and high-dimensional propensity score decile. Abbreviations: CI = Confidence Interval; GPRD = General Practice Research Database; OR = Odds Ratio.

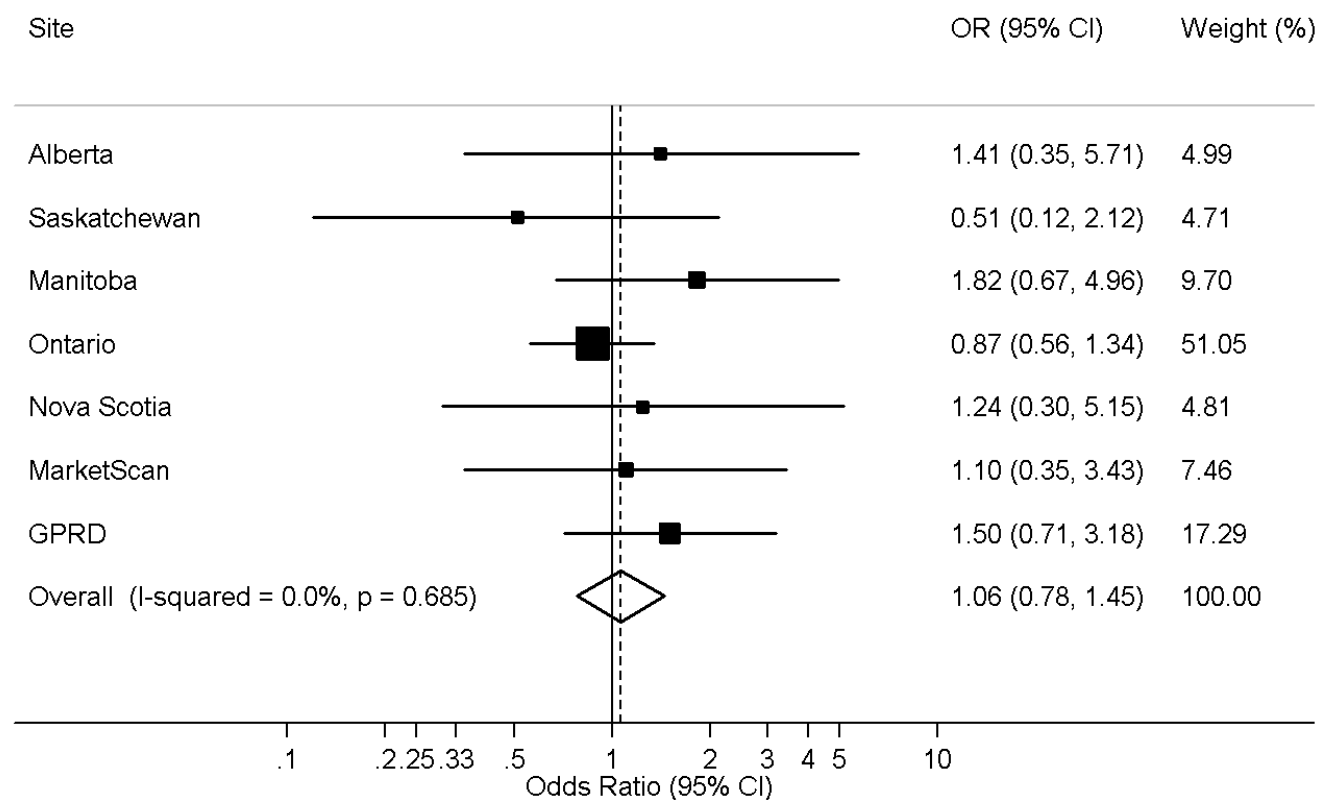

**Online Appendix 8.** Sensitivity analysis examining the association between the use of histamine-2 receptor antagonists and the 6-month cumulative incidence of hospitalization for community-acquired pneumonia in a restricted cohort of new users of non-steroidal anti-inflammatory drugs and excluding cross-overs. Analyses were adjusted for age, sex, previous non-hospitalized pneumonia, prescription of proton pump inhibitors, histamine-2 receptor antagonists, and non-steroidal anti-inflammatory drugs in the 7 to 12 months prior to cohort entry, and high-dimensional propensity score decile. Abbreviations: CI = Confidence Interval; GPRD = General Practice Research Database; OR = Odds Ratio.

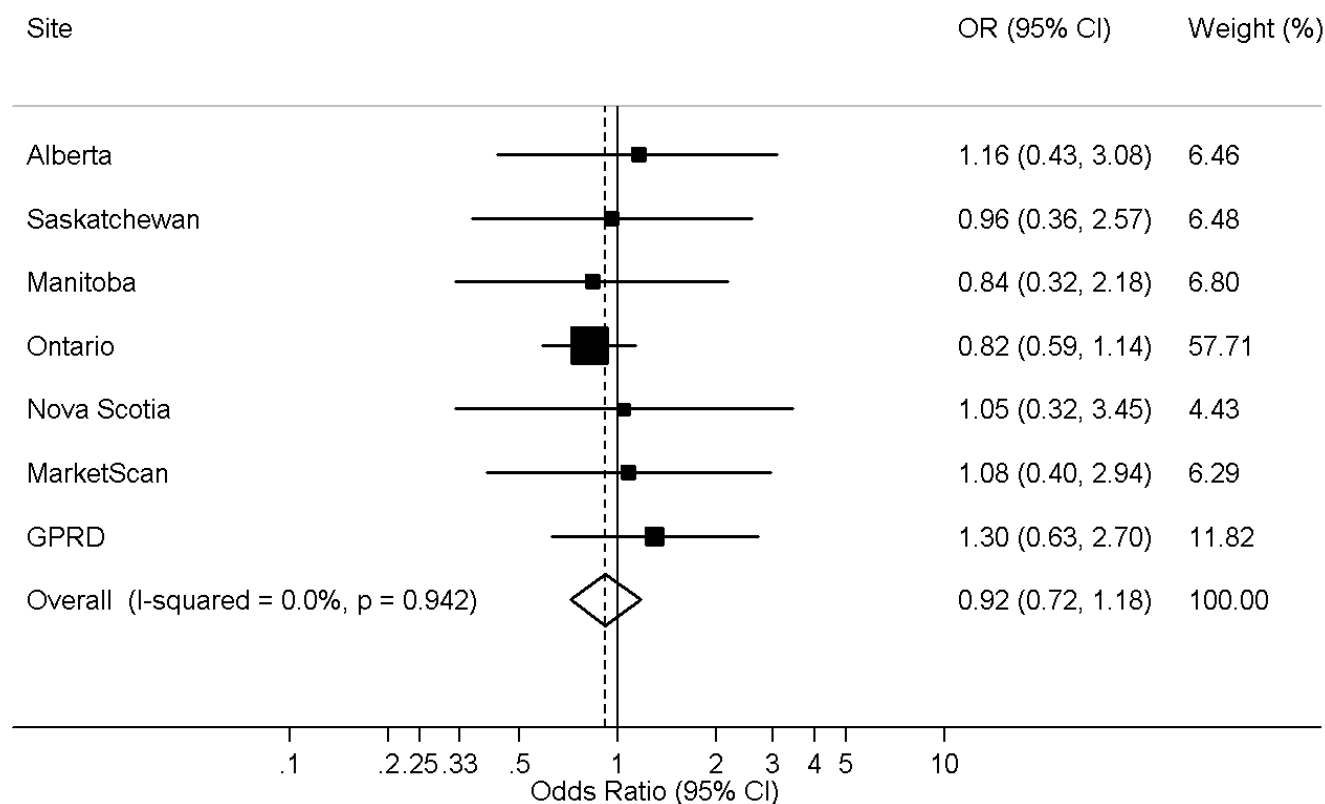

Supplement: gutjnl-2013-304738supp_appendices.pdf [file gutjnl-2013-304738supp_appendices.pdf]
